# Supplementary material for: Effect on Germline Mutation Rate in a High-Risk Chinese Breast Cancer Cohort after Compliance with The National Comprehensive Cancer Network (NCCN) 2023 v.1 Testing Criteria
Source: MDPI journal article supplement (doi:10.3390/cancers15092635), 2023-05-06
Supplement: s1 [file s1]

Supplementary Table S1. 30 Genes Panel covering most of the relevant genes for mutations that could increase risk for Breast, Ovarian, Uterine, Colorectal, Melanoma, Pancreatic, Stomach, Prostate

| <b>30 Genes Panel</b> |         |         |        |        |         |
|-----------------------|---------|---------|--------|--------|---------|
| BRCA1                 | BRCA2   | MLH1    | MSH2   | MSH6   | PMS2*** |
| EPCAM**               | APC     | MUTYH   | MITF** | BAP1   | CDKN2A  |
| CDK4**                | TP53    | PTEN    | STK11  | CDH1   | BMPR1A  |
| SMAD4                 | GREM1** | POLD1** | POLE** | PALB2  | CHEK2   |
| ATM                   | NBN     | BARD1   | BRIP1  | RAD51C | RAD51D  |

\*\* Only positions known to impact cancer risk analyzed: CDK4: only chr12:g.58145429-58145431 (codon 24) analyzed, EPCAM: only large deletions and duplications including 3' end of the gene analyzed, GREM1: only duplications in the upstream regulatory region analyzed, MITF: only chr3:g.70014091 (including c.952G>A) analyzed, POLD1: only chr19:g.50909713 (including c.1433G>A) analyzed, POLE: only chr12:g.133250250 (including c.1270C>G) analyzed.

\*\*\* PMS2: Exons 12-15 not analyzed.
